## Correction: Endothelial microparticles delivering microRNA-155 into T lymphocytes are involved in the initiation of acute graft-versus-host disease following allogeneic hematopoietic stem cell transplantation

Ran Zhang<sup>1,\*</sup>, Xiaoxiao Wang<sup>1,\*</sup>, Mei Hong<sup>1,\*</sup>, Ting Luo<sup>1</sup>, Miaomiao Zhao<sup>1</sup>, Haorui Shen<sup>1</sup>, Jun Fang<sup>1</sup>, Xiaojie Li<sup>1</sup>, Sibin Zang<sup>1</sup>, Ping Chen<sup>1</sup>, Dimin Nie<sup>1</sup>, Peng Zheng<sup>1</sup>, Qiuling Wu<sup>1</sup> and Linghui Xia<sup>1</sup>

<sup>1</sup> Institute of Hematology, Union Hospital, Tongji Medical College, Huazhong University of Science and Technology, Wuhan 430022, China

\* These authors contributed equally to this work

**Published:** August 29, 2017

Copyright: Zhang et al. This is an open-access article distributed under the terms of the Creative Commons Attribution License 3.0 (CC BY 3.0), which permits unrestricted use, distribution, and reproduction in any medium, provided the original author and source are credited.

**This article has been corrected:** the institution information was updated to include the postal code.  
The authors sincerely apologize for this oversight.

Original article: Oncotarget. 2017; 8:23360-23375. <https://doi.org/10.18632/oncotarget.15579>
